# Supplementary material
Source: publisher figshare collection journal article supplement (https://acs.figshare.com/ndownloader/files/13747205)

## Electronic Supporting Information (ESI)

### Facile Synthesis of Mesoporous Carbon Spheres Using 3D Cubic Fe-KIT-6 by CVD Technique for the Application of Active Electrode Materials in Supercapacitors

Govindarasu Gunasekaran Karthikeyan<sup>†</sup>, Ganesan Boopathi<sup>‡</sup> and Arumugam Pandurangan\*,<sup>†</sup>

<sup>†</sup> Department of Chemistry, Anna University, Chennai 600025, Tamil Nadu, India

<sup>‡</sup> Laboratory of Experimental and Applied Physics, Centro Federal de Educação Tecnológica Celso Suckow da Fonseca, Av. Maracanã 229, Rio de Janeiro 20271-110, Brazil

\*E-mail: pandurangan\_a@yahoo.com.

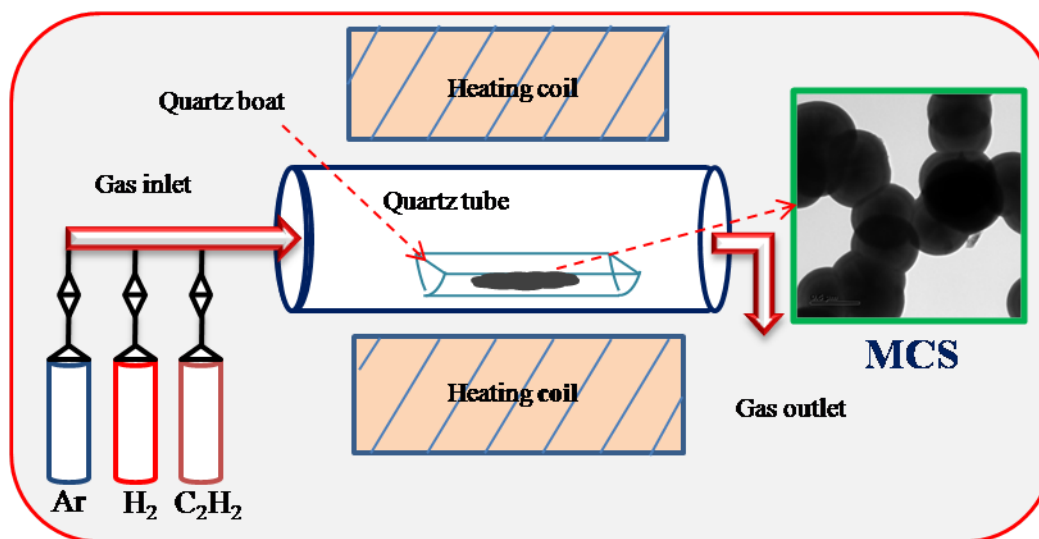

**Figure S1** Schamatic representation of CVD synthesis of MCS.

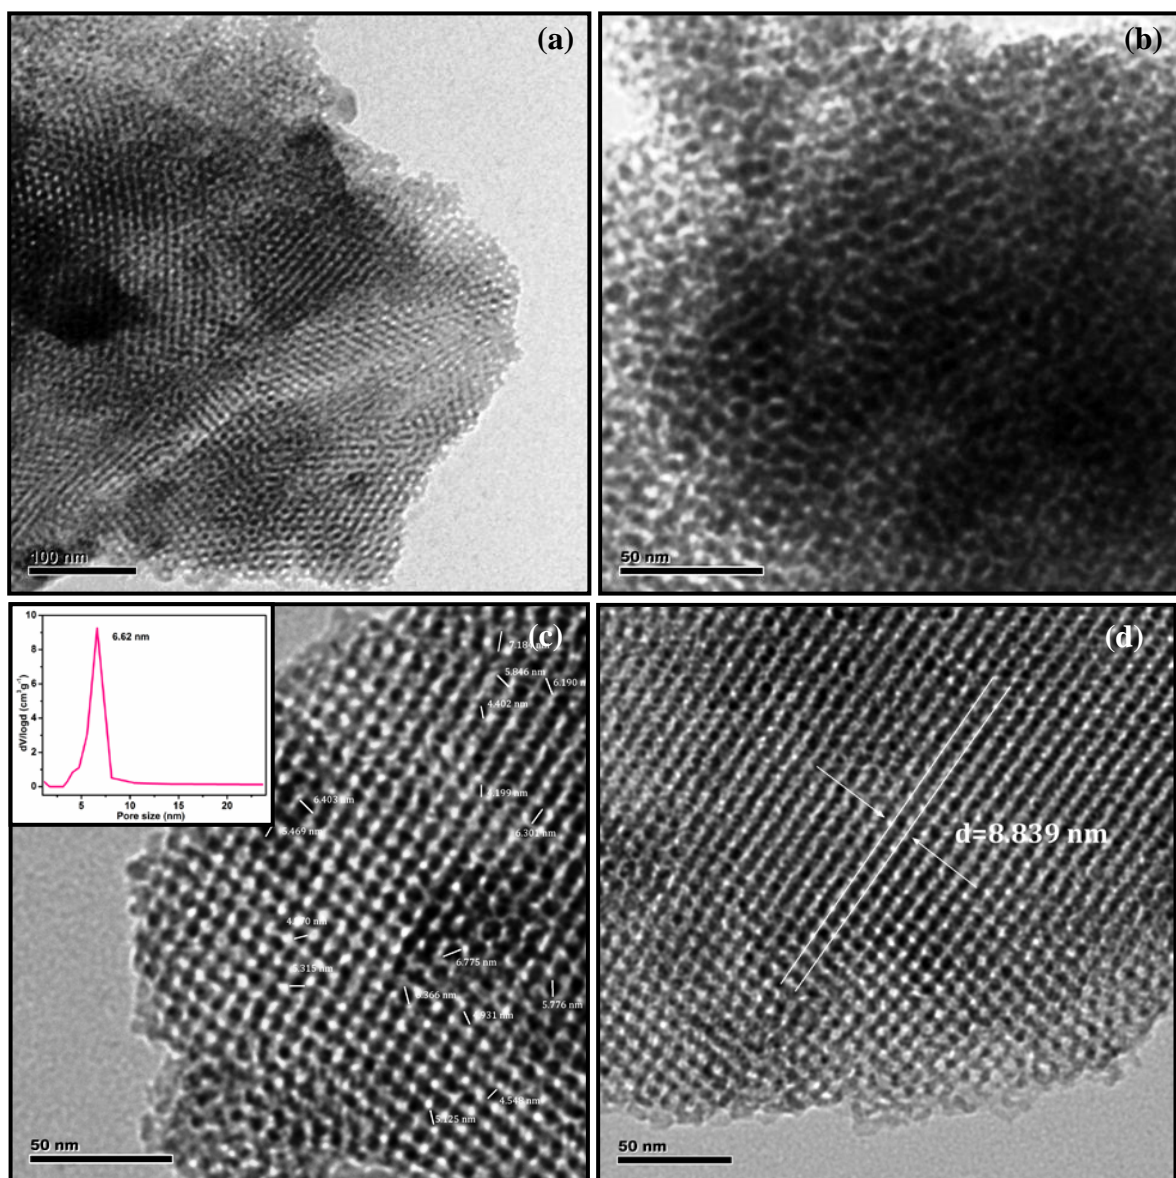

**Figure S2** HRTEM images of 3D cubic structure of Fe-KIT-6 (a and b) at different magnifications; Average pore size of Fe-KIT-6 (c) and inset of (c) depicts the average pore size from N<sub>2</sub> adsorption/desorption; HRTEM image used for d-spacing measurement (d).

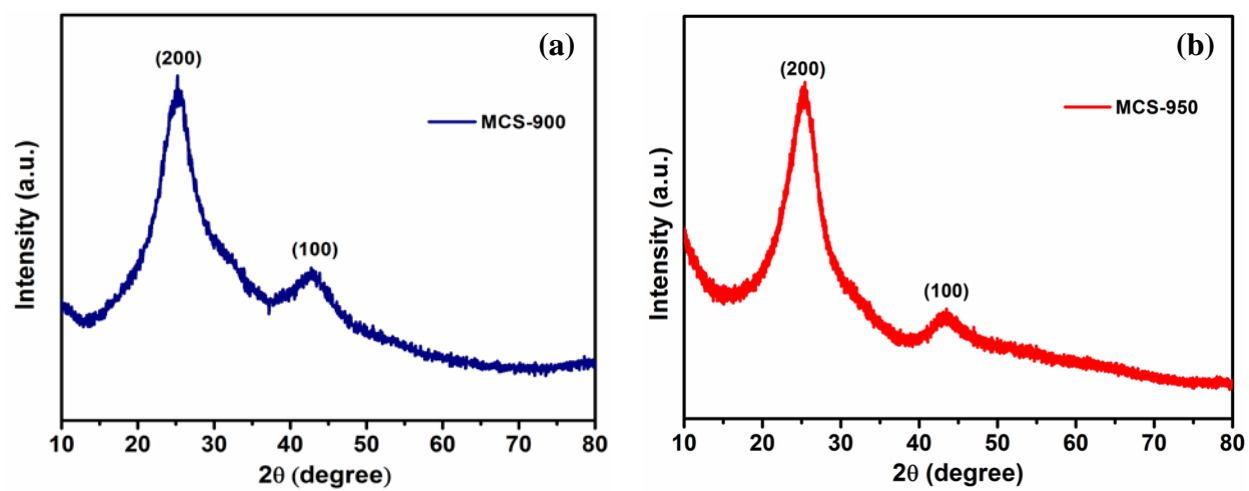

**Figure S3** XRD spectrum of MCS-900 (a) and MCS-950 (b).

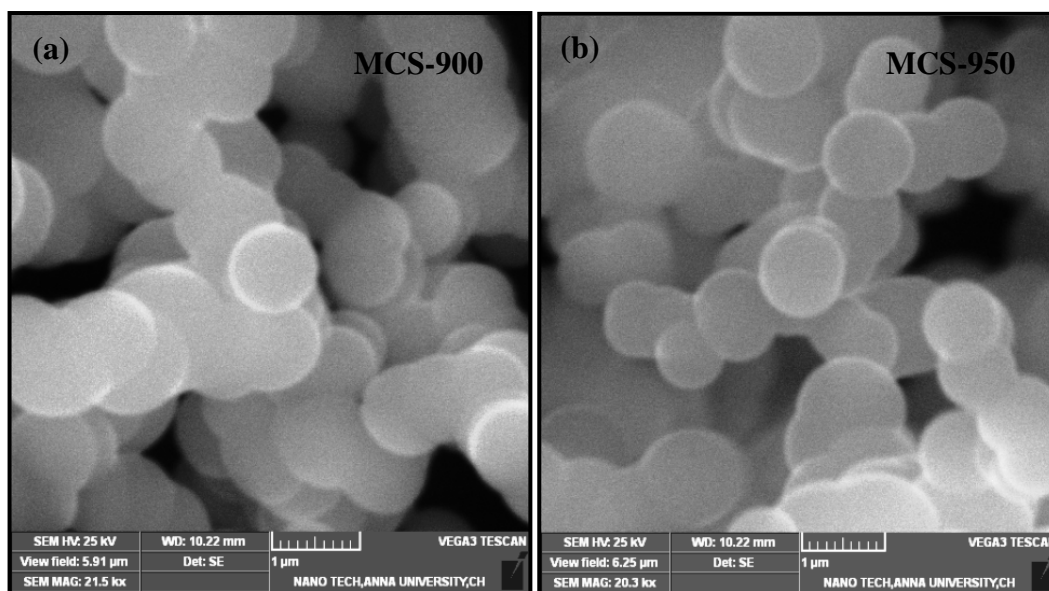

**Figure S4** SEM images of MCS-900 (a) and MCS-950 (b).

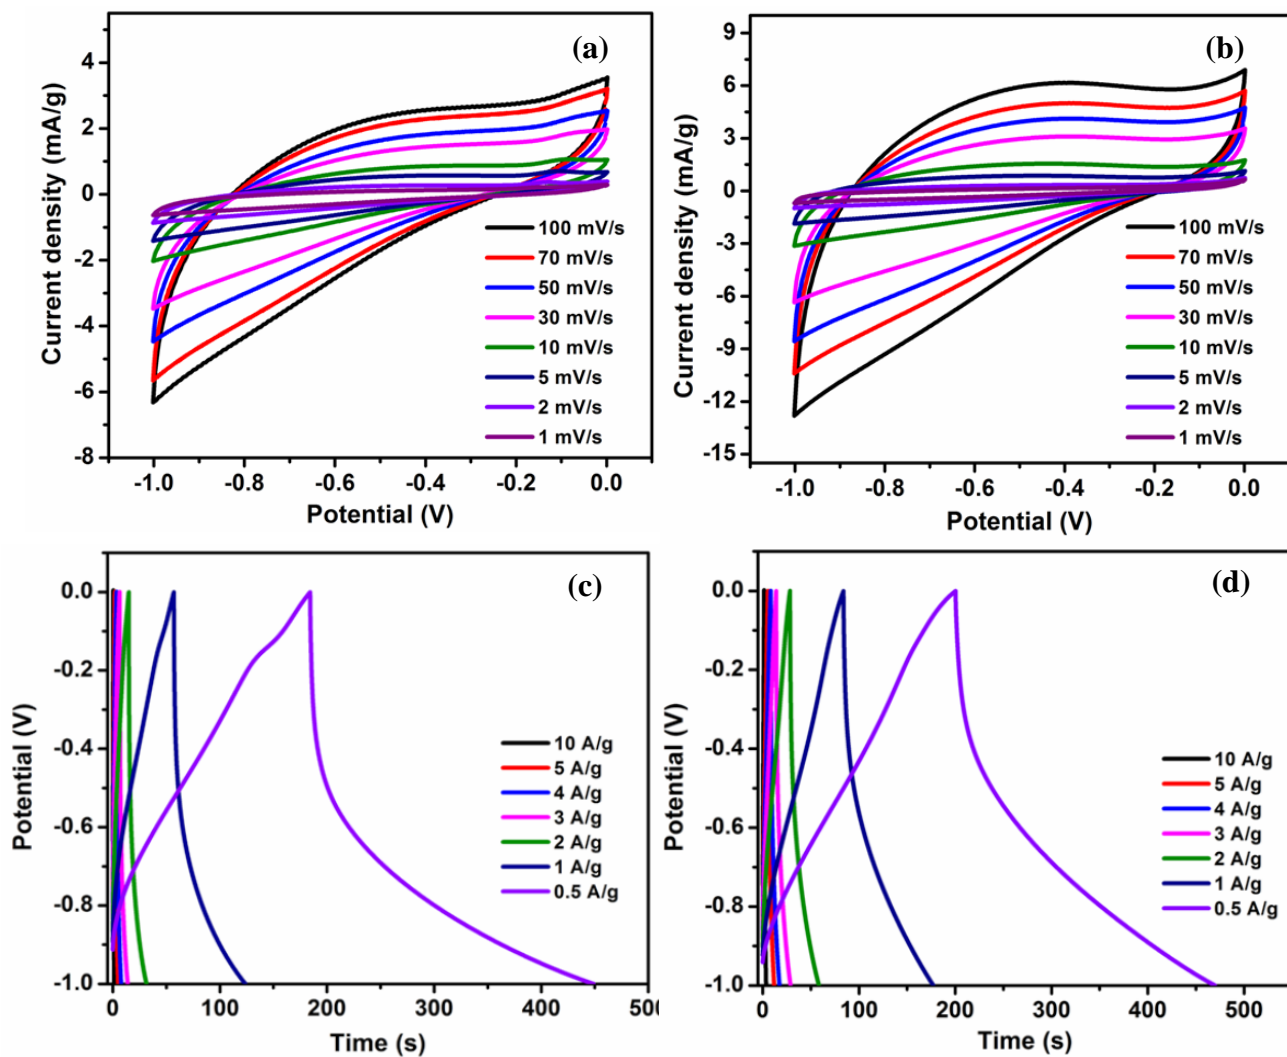

**Figure S5** CV curves of MCS-750 (a) and MCS-800 (b) at various scan rates, GCD curves of MCS-750 (c) and MCS-800 (d) at various current densities.

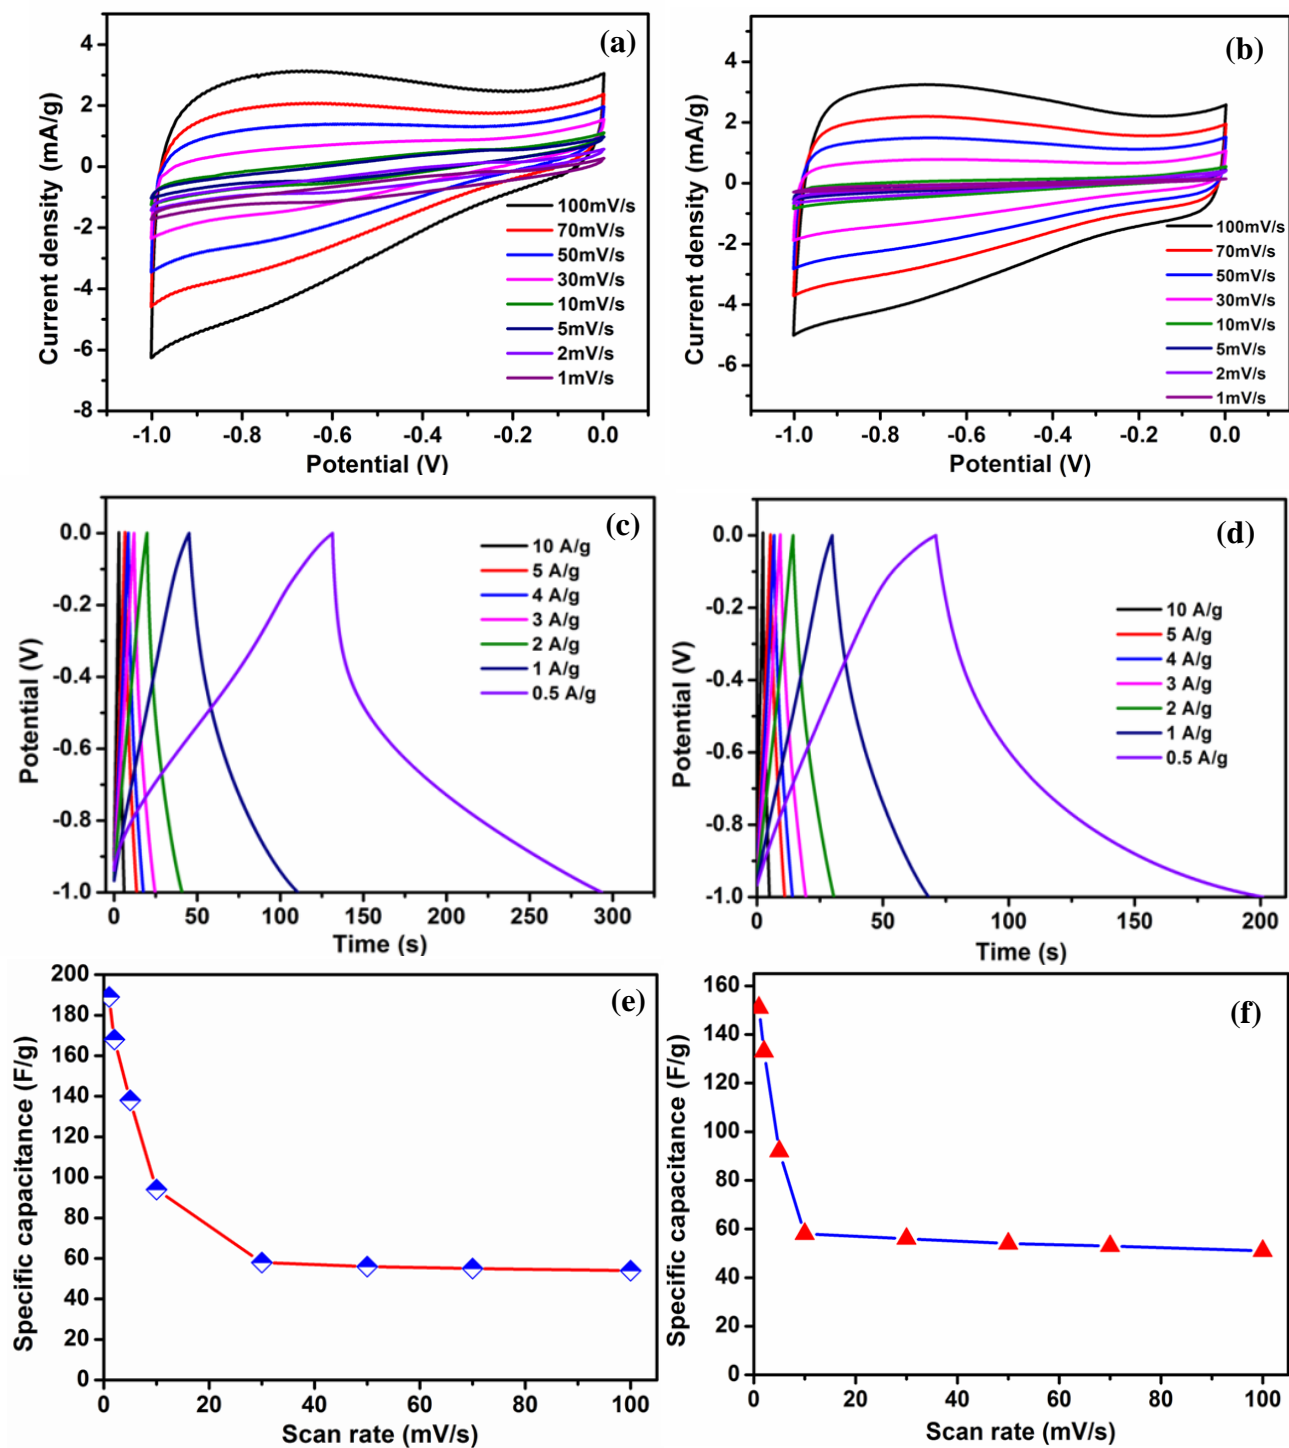

**Figure S6** CV curves of MCS-900 (a) and MCS-950 (b) at different scan rates, GCD curves of MCS-900 (c) and MCS-950 (d) at various current densities, specific capacitance vs. scan rate of MCS-900 (e) and MCS-950 (f).

**Table S1** Relative intensities (in terms of %) of different oxygen functionalities were estimated from XPS analysis.

| Sample name | MCS-750<br>Rel. Int. (%) | MCS-800<br>Rel. Int. (%) | MCS-850<br>Rel. Int. (%) |
|-------------|--------------------------|--------------------------|--------------------------|
| C—C         | 65.3                     | 58                       | 40.6                     |
| C—O         | 13                       | 16.6                     | 30                       |
| C=O         | 9.3                      | 11.6                     | 19.5                     |
| O—C=O       | 12.2                     | 13.5                     | 9.7                      |

**Table S2** Specific capacitance measurement using CV and GCD curves of MCS-900 and MCS-950.

| C <sub>sp</sub> (from CV)  |                         |     |     |    |    |    |    |     |
|----------------------------|-------------------------|-----|-----|----|----|----|----|-----|
| Sample name                | Scan rates (mV/s)       |     |     |    |    |    |    |     |
|                            | 1                       | 2   | 5   | 10 | 30 | 50 | 70 | 100 |
| MCS-900                    | 189                     | 168 | 138 | 94 | 58 | 56 | 55 | 54  |
| MCS-950                    | 151                     | 133 | 92  | 58 | 56 | 54 | 53 | 51  |
| C <sub>sp</sub> (from GCD) |                         |     |     |    |    |    |    |     |
| Sample name                | Current densities (A/g) |     |     |    |    |    |    |     |
|                            | 0.5                     | 1   | 2   | 3  | 4  | 5  | 10 |     |
| MCS-900                    | 86                      | 67  | 42  | 39 | 36 | 35 | 30 |     |
| MCS-950                    | 65                      | 38  | 35  | 34 | 32 | 31 | 30 |     |



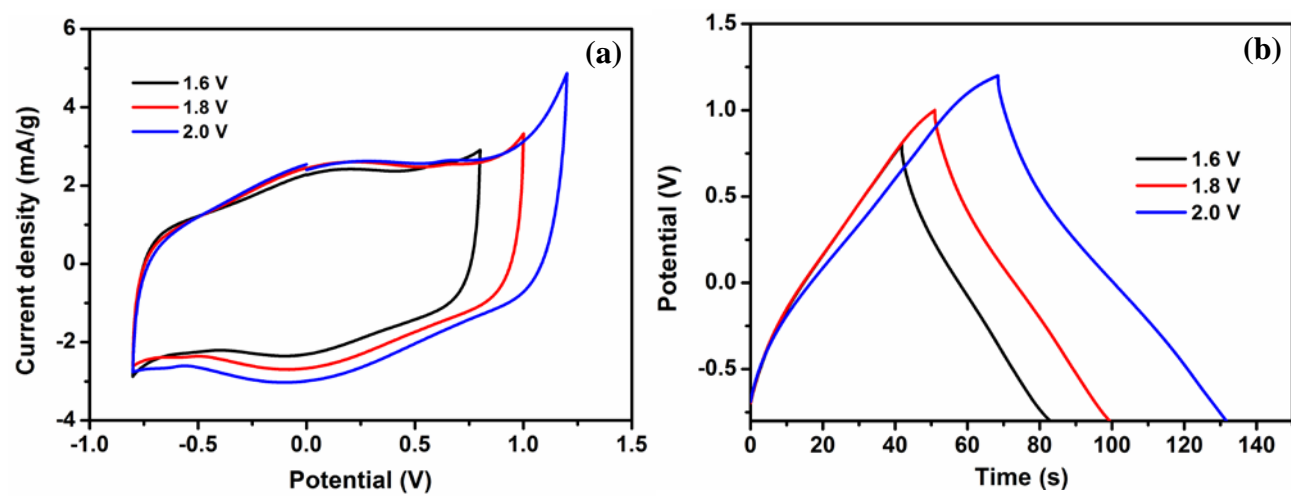

**Figure S7** CV and GCD curves of symmetric device (a and b) at different potential windows.

**Table S3** Interfacial electrochemical parameters of the prepared materials.

| Sample name | $R_s(\Omega)$ | $R_{ct1}(\Omega)$ |
|-------------|---------------|-------------------|
| MCS-750     | 0.57          | 1.96              |
| MCS-800     | 0.54          | 2.59              |
| MCS-850     | 0.67          | 0.69              |

**Table S4** Specific capacitances of symmetric device derived from CV and GCD profiles.

| Sample name                               | $C_{sp}$ (from CV)      |     |    |    |    |     |
|-------------------------------------------|-------------------------|-----|----|----|----|-----|
| Two-electrode symmetric cell<br>(MCS-850) | Scan rates (mV/s)       |     |    |    |    |     |
|                                           | 5                       | 10  | 30 | 50 | 70 | 100 |
|                                           | 63                      | 60  | 58 | 54 | 52 | 48  |
|                                           | $C_{sp}$ (from GCD)     |     |    |    |    |     |
|                                           | Current densities (A/g) |     |    |    |    |     |
|                                           | 0.3                     | 0.5 | 1  | 5  |    |     |
|                                           | 63                      | 56  | 50 | 23 |    |     |

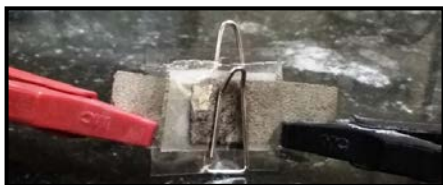

Supplement: Supplementary file 1 [file 13747205]
